# Supplementary material for: MCT1 Deletion in Oligodendrocyte Lineage Cells Causes Late-Onset Hypomyelination and Axonal Degeneration
Source: PubMed Central journal article supplement — Cell Rep. Author manuscript; Available in PMC 2021 Apr 5. (PMC8020895; doi:10.1016/j.celrep.2020.108610), 2021-01-12
Supplement: NIHMS1662659-supplement-1.pdf [file NIHMS1662659-supplement-1.pdf]

**Cell Reports, Volume 34**

**Supplemental Information**

**MCT1 Deletion in Oligodendrocyte Lineage Cells**

**Causes Late-Onset Hypomyelination**

**and Axonal Degeneration**

**Thomas Philips, Yevgeniya A. Mironova, Yan Jouroukhin, Jeannie Chew, Svetlana Vidensky, Mohamed H. Farah, Mikhail V. Pletnikov, Dwight E. Bergles, Brett M. Morrison, and Jeffrey D. Rothstein**

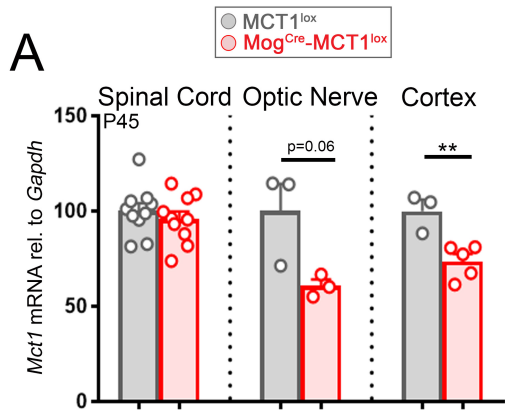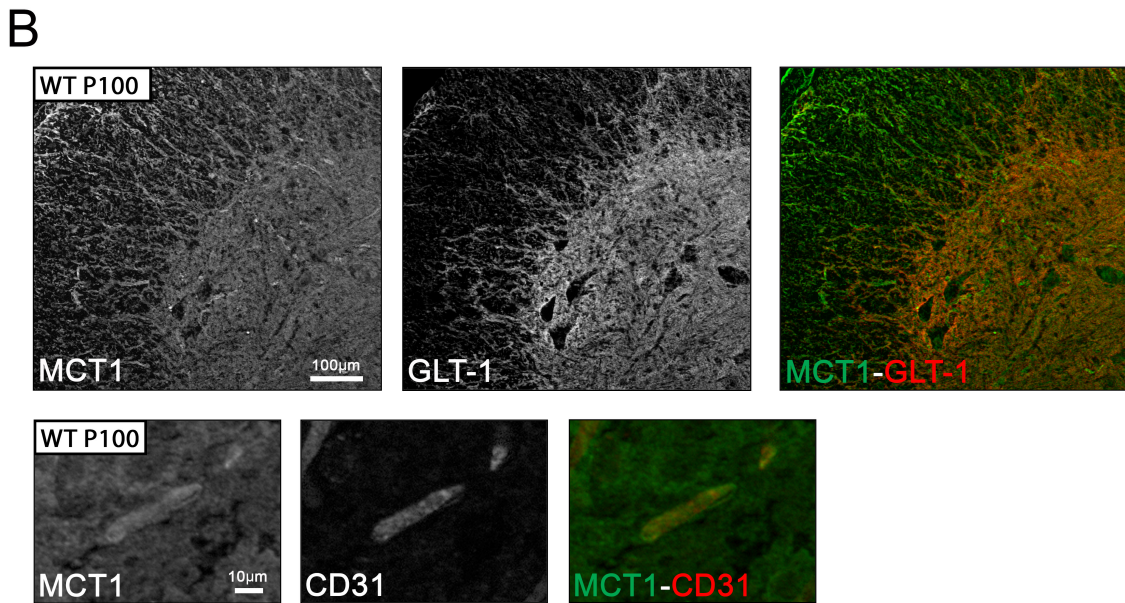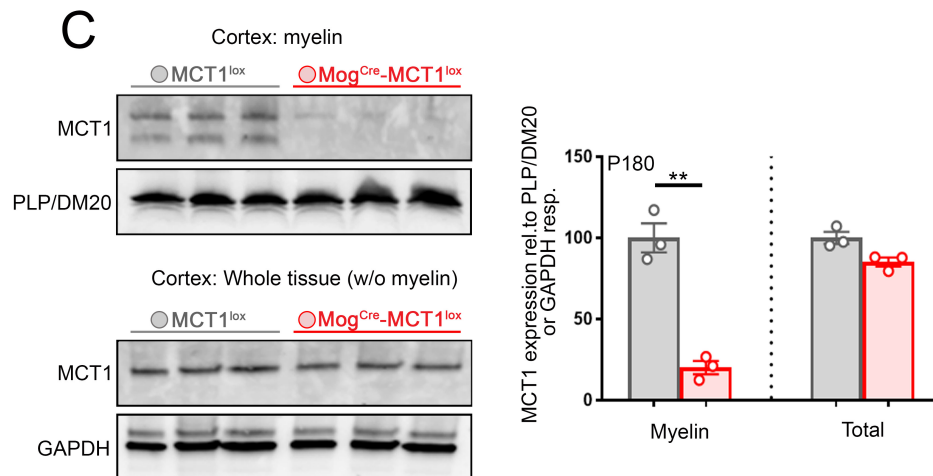



**Figure S1: Validation of mRNA and protein changes in the *Mog*<sup>Cre</sup>-MCT1<sup>lox</sup> mice and MCT1<sup>lox</sup> mice and MCT1 antibody immunostaining validation in astrocytes and endothelial cells. Related to Figure 2.**

(A) Quantification of *Mct1* mRNA in P45 *Mog*<sup>Cre</sup>-MCT1<sup>lox</sup> and MCT1<sup>lox</sup> mice in different CNS regions. There is a 26% reduction in *Mct1* mRNA in whole cortex RNA extracts (n=3-10, \*\*p<0.01, Student's t-test). Data is represented as mean ± SEM.

(B) Top panel: Co-Immunolabeling of MCT1 and GLT-1 in astrocytes in the mouse lumbar spinal cord of P100 non-transgenic animals (WT). Bottom panel: Co-immunolabeling of MCT1 and CD31 in endothelial cells in the mouse lumbar spinal cord of P100 non-transgenic animals (WT).

(C) Quantification of MCT1 protein in myelin protein extracts derived from P180 *Mog*<sup>Cre</sup>-MCT1<sup>lox</sup> and MCT1<sup>lox</sup> cortical tissue. There is an 80% reduction in myelin MCT1 protein expression (n=3, \*\*p<0.01, Student's t-test). Expression in whole tissue (without myelin) was not different between *Mog*<sup>Cre</sup>-MCT1<sup>lox</sup> and MCT1<sup>lox</sup> mice. Data is represented as mean ± SEM.

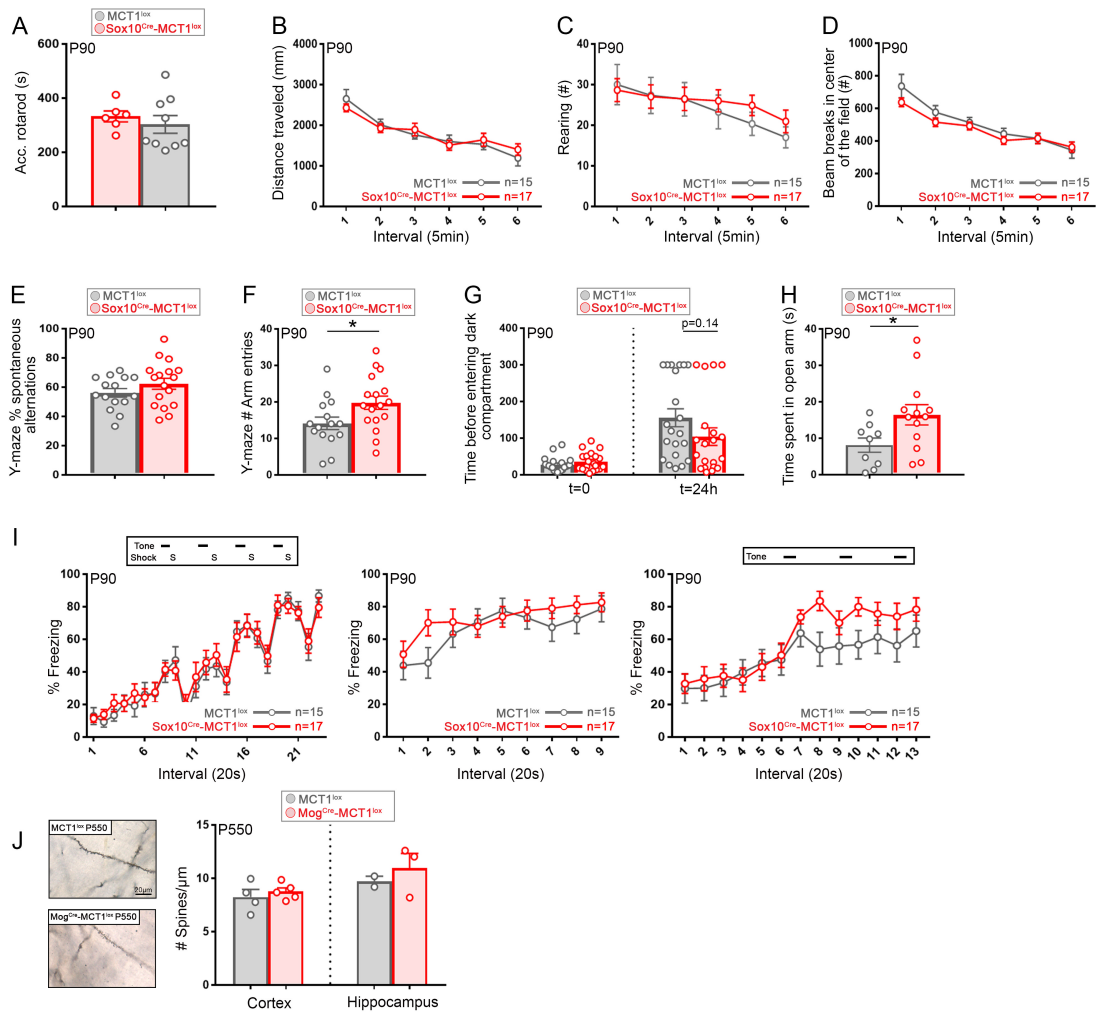

**Figure S2: Behavior analysis of P90 Sox10<sup>Cre</sup>-MCT1<sup>lox</sup> and MCT1<sup>lox</sup> littermate control mice.**

**Related to Figure 4.**

(A) Accelerated rotarod test does not reveal significant differences between Sox10<sup>Cre</sup>-MCT1<sup>lox</sup> and MCT1<sup>lox</sup> littermates (n=6-9). Data is represented as mean ± SEM.

(B-D) Open field testing does not show any differences in distance travelled (B), rearing (C) and presence in the center versus periphery (D) between Sox10<sup>Cre</sup>-MCT1<sup>lox</sup> and MCT1<sup>lox</sup> littermates (n=15-17). Data is represented as mean  $\pm$  SEM.

(E-F) Working memory assessment in Y-maze does not reveal differences in % spontaneous alternations but showed a 1.4-fold increase in the number of arm entries in the Sox10<sup>Cre</sup>-MCT1<sup>lox</sup> mice as compared to the MCT1<sup>lox</sup> controls (n=15-17, \*p<0.05, Student's t-test). Data is represented as mean  $\pm$  SEM.

(G) Passive avoidance test does not reveal differences between Sox10<sup>Cre</sup>-MCT1<sup>lox</sup> and MCT1<sup>lox</sup> mice. t=0: the delay for entering a dark compartment after being placed in a brightly lit compartment. The mouse undergoes a 0.5mV shock when entering the dark compartment. t=24h: the delay for each mouse to enter the dark compartment 24 hours after it has been shocked (n=20-21). Data is represented as mean  $\pm$  SEM.

(H) Time spent in the open arm of the Elevated Plus Maze. There is a 2-fold increase in the percentage of time spent in the open arm in the Sox10<sup>Cre</sup>-MCT1<sup>lox</sup> as compared to the MCT1<sup>lox</sup> controls (n=9-13, \*p<0.05, Student's t-test). Data is represented as mean  $\pm$  SEM.

(I) Fear trace conditioning test. Left panel: Training stage: Freezing behavior 24 hours after being preconditioned in the same environment. Mice were exposed to a 90dB tone for 20 seconds for 4 consecutive times. All 4 tones were followed by a 0.5 mV shock for 2 seconds. Middle panel: Context phase: Freezing behavior in the same environment as where the mouse was shocked 24 hours earlier. Right panel: Cued phase: Freezing behavior after hearing 3 bouts of the same tone as in the training phase. The mouse has been placed in a different environment as compared to the earlier phases. There

are no significant differences in freezing behavior at any stage between the Sox10<sup>Cre</sup>-MCT1<sup>lox</sup> and MCT1<sup>lox</sup> mice (n=15-17). Data is represented as mean  $\pm$  SEM.

(J) Spine density measurements in the cortex and hippocampus of P550 Mog<sup>Cre</sup>-MCT1<sup>lox</sup> and MCT1<sup>lox</sup> littermate controls reveal no significant differences (n=2-5). Data is represented as mean  $\pm$  SEM.

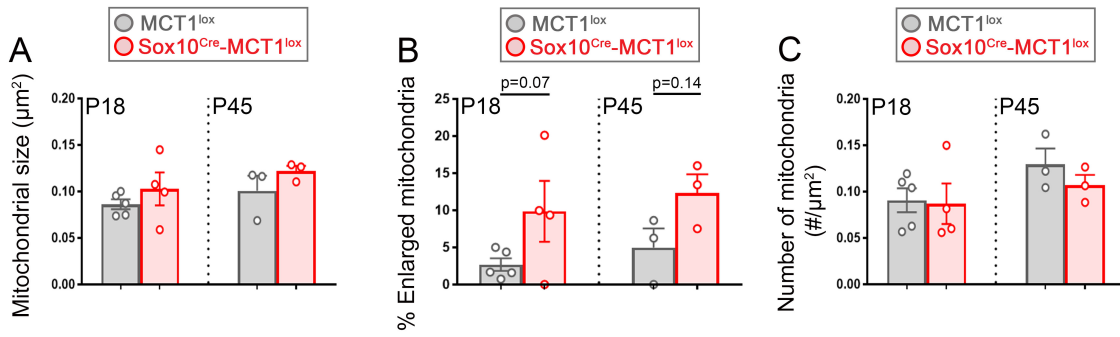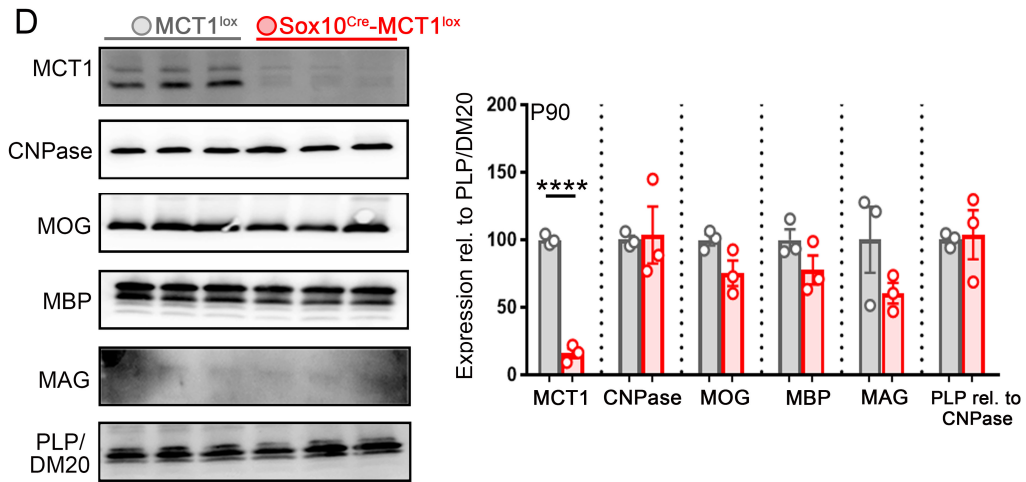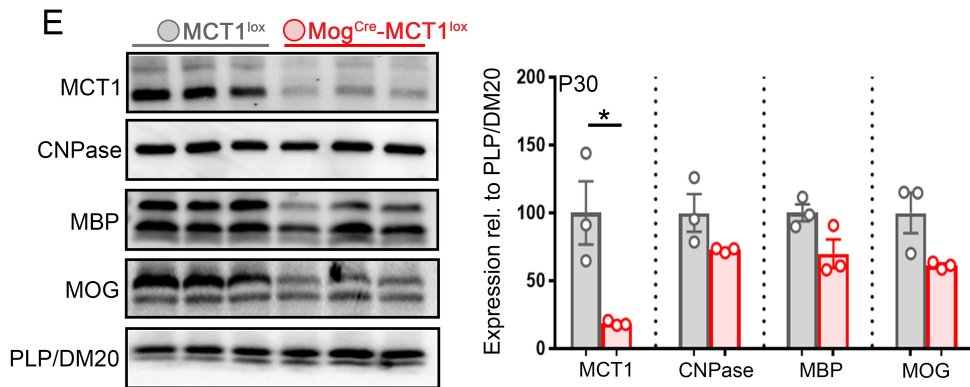

**Figure S3: Analysis of mitochondrial size in P18 and P45 Sox10<sup>Cre</sup>-MCT1<sup>lox</sup> mice and myelin protein expression in early adult Sox10<sup>Cre</sup>-MCT1<sup>lox</sup>, Mog<sup>Cre</sup>-MCT1<sup>lox</sup> mice compared to MCT1<sup>lox</sup> mice. Related to Figure 4.**

(A-B) Analysis of electron microscopic images of optic nerve axons indicates there is no difference in mitochondrial size (A) or % of enlarged mitochondria ( $>0.20\mu\text{m}^2$ , B) between Sox10<sup>Cre</sup>-MCT1<sup>lox</sup> and MCT1<sup>lox</sup> mice at either P18 or P45 (n=3-5). Data is represented as mean  $\pm$  SEM.

(C) Analysis of electron microscopic images of optic nerve axons indicates there is no difference in the number of mitochondria when comparing Sox10<sup>Cre</sup>-MCT1<sup>lox</sup> and MCT1<sup>lox</sup> mice at either P18 or P45 (n=4-5). Data is represented as mean  $\pm$  SEM.

(D) Changes in expression of myelin proteins in cortical myelin protein extracts derived from P90 Sox10<sup>Cre</sup>-MCT1<sup>lox</sup> and MCT1<sup>lox</sup> control mice. There is an 84% reduction in expression of MCT1 whereas expression of CNPase, MBP, MOG and MAG was unchanged as compared to MCT1<sup>lox</sup> controls (n=3, \*\*\*\*p<0.0001, Student's t-test). Data is represented as mean  $\pm$  SEM.

(E) Changes in expression of myelin proteins in spinal cord myelin protein extracts derived from P30 Mog<sup>Cre</sup>-MCT1<sup>lox</sup> and MCT1<sup>lox</sup> control mice. There is an 81% reduction in expression of MCT1 while the expression of MOG, CNPase and MBP was unchanged as compared to MCT1<sup>lox</sup> controls (n=3, \*p<0.05, Student's t-test). Data is represented as mean  $\pm$  SEM.





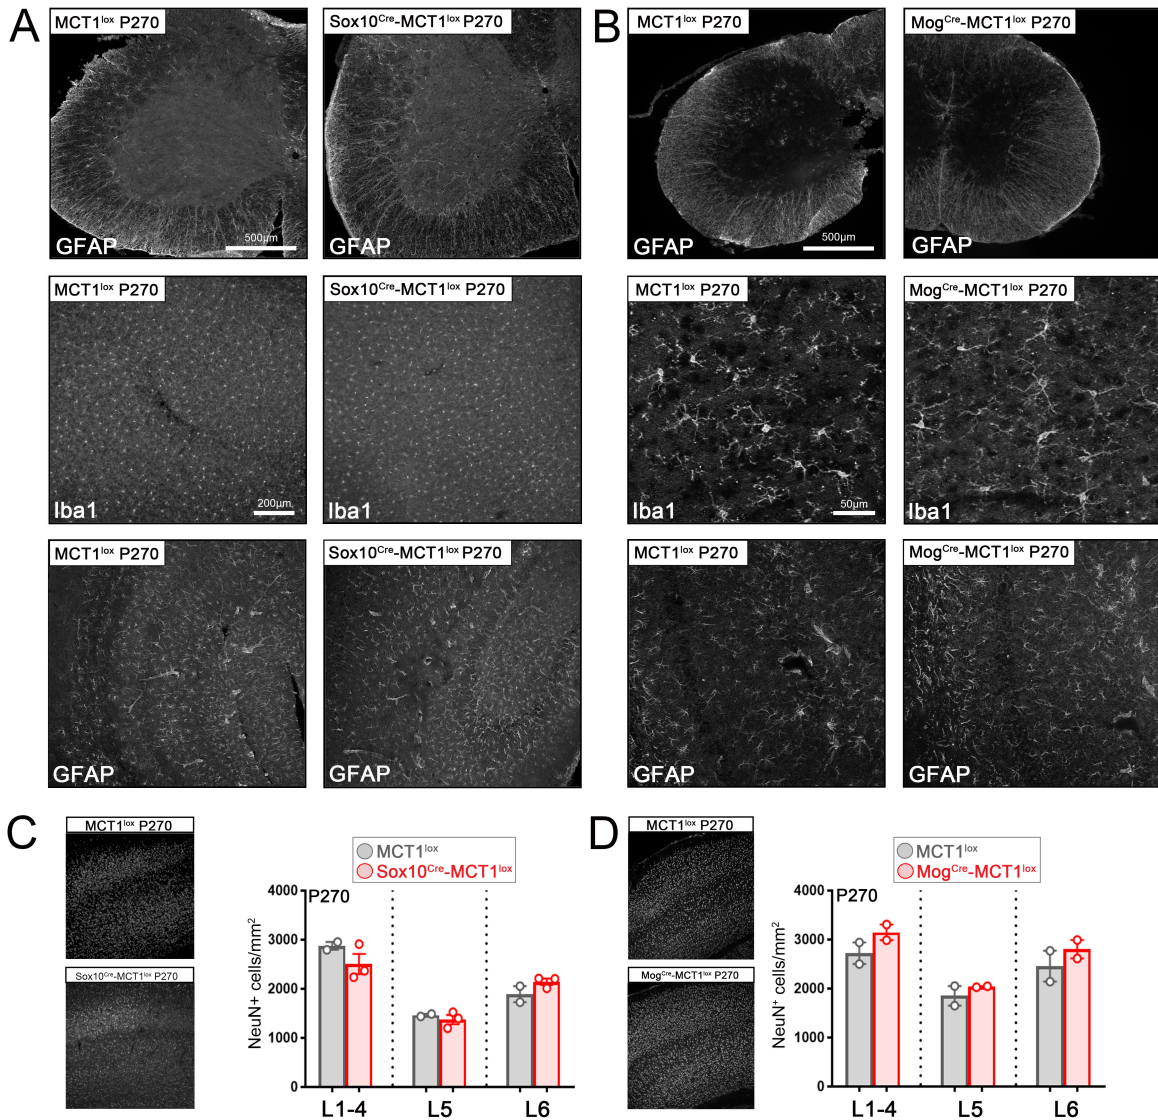

**Figure S4: Glial reactivity and neuronal cell density measurements in spinal cord, cortex and hippocampus of P270 Sox10<sup>Cre</sup>-MCT1<sup>lox</sup>, Mog<sup>Cre</sup>-MCT1<sup>lox</sup> and MCT1<sup>lox</sup> mice. Related to Figure 5 and Figure 6.**

(A) GFAP and Iba1 immunostaining in the lumbar spinal cord (top panel), cortex (middle panel) and hippocampus (lower panel) does not reveal changes in glial reactivity when comparing P270 Sox10<sup>Cre</sup>-MCT1<sup>lox</sup> and MCT1<sup>lox</sup> controls.

(B) GFAP and Iba1 immunostaining in the cervical spinal cord (top panel), cortex (middle panel) and hippocampus (lower panel) does not reveal changes in glial reactivity when comparing P270 Mog<sup>Cre</sup>-MCT1<sup>lox</sup> and MCT1<sup>lox</sup> controls.

(C) There is no difference in the number of NeuN<sup>+</sup> neurons quantified in the cortex layer 1-4 (L4), layer 5 (L5) and layer 6 (L6) in P270 Sox10<sup>Cre</sup>-MCT1<sup>lox</sup> and MCT1<sup>lox</sup> controls (n=2-3). Data is represented as mean  $\pm$  SEM.

(D) There is no difference in the number of NeuN<sup>+</sup> neurons quantified in the cortex layer 1-4 (L4), layer 5 (L5) and layer 6 (L6) in P270 Mog<sup>Cre</sup>-MCT1<sup>lox</sup> and MCT1<sup>lox</sup> controls (n=2). Data is represented as mean  $\pm$  SEM.

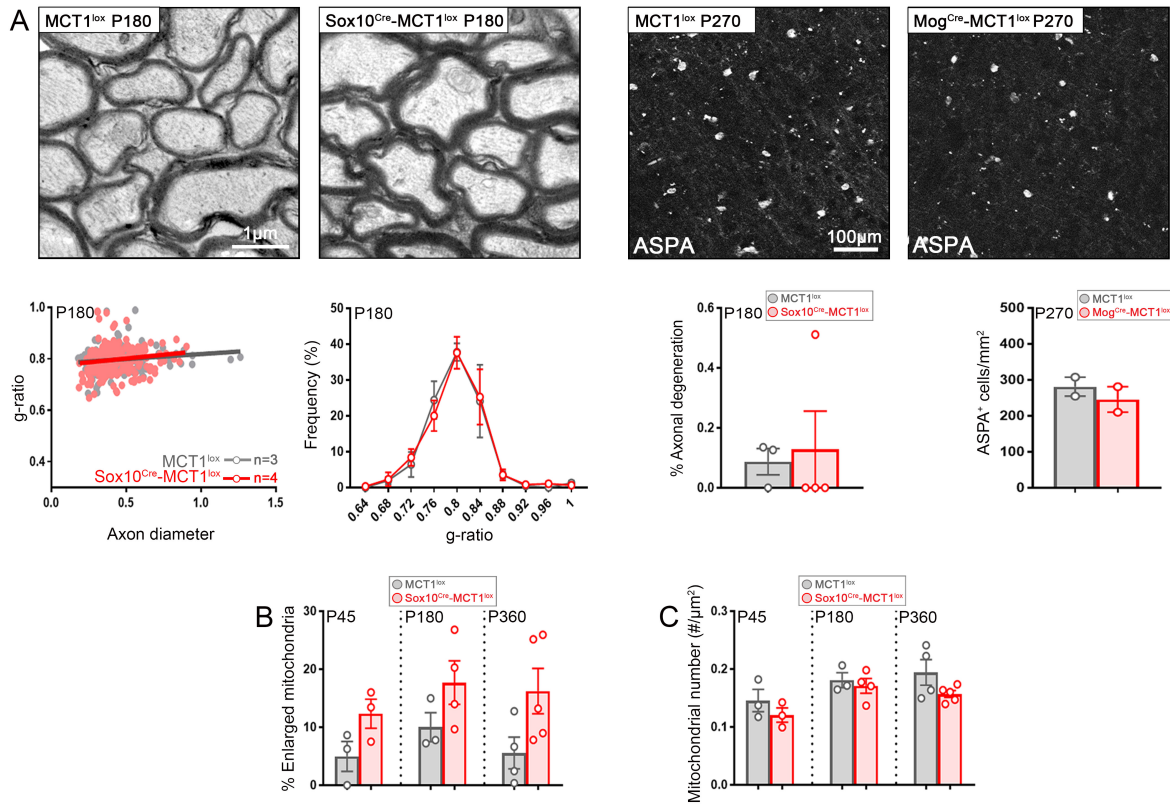

**Figure S5: Evaluation of myelin thickness, oligodendrocyte cell counts and mitochondrial size in P45-P360 Sox10<sup>Cre</sup>-MCT1<sup>lox</sup>, Mog<sup>Cre</sup>-MCT1<sup>lox</sup> and MCT1<sup>lox</sup> mice. Related to Figure 5 and Figure 6.**

(A) Left panels: Electron microscopy images from the optic nerves from P180 Sox10<sup>Cre</sup>-MCT1<sup>lox</sup> and MCT1<sup>lox</sup> controls. There is no axonal pathology and no change in myelin thickness (g-ratio) is observed (n=3-4). Right panels: Immunostaining of ASPA<sup>+</sup> oligodendrocytes counted in the cortex of P270 Mog<sup>Cre</sup>-MCT1<sup>lox</sup> and MCT1<sup>lox</sup> controls. The number of oligodendrocytes was not different between the two groups (n=2). Data is represented as mean ± SEM.

(B) There are no differences in the percentage of enlarged mitochondria (>0.20μm<sup>2</sup>) as observed on electron microscopy images taken from optic nerves dissected from P45, P180 and P360 old Sox10<sup>Cre</sup>-MCT1<sup>lox</sup> and MCT1<sup>lox</sup> mice (n=3-5). Data is represented as mean ± SEM.

(C) There are no differences in the number of mitochondria (per  $\mu\text{m}^2$ ) measured on electron microscopy images taken from optic nerves dissected from P45, P180 and P360 old Sox10<sup>Cre</sup>-MCT1<sup>lox</sup> and MCT1<sup>lox</sup> mice (n=3-5). Data is represented as mean  $\pm$  SEM.

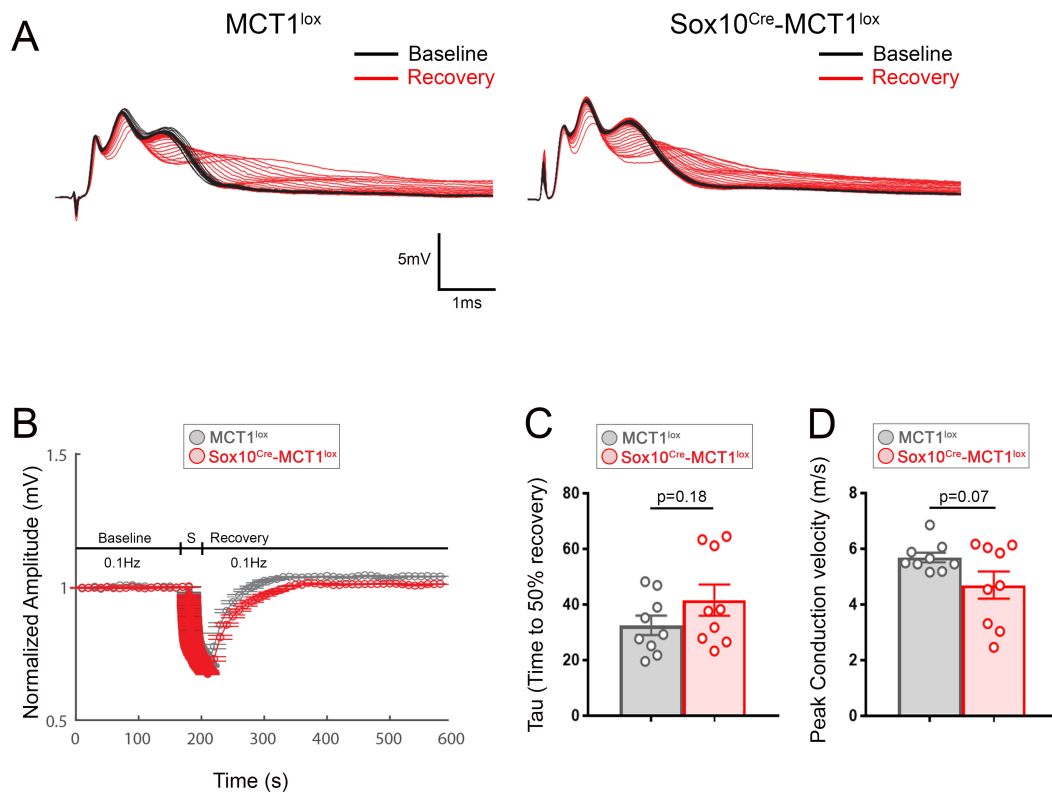

**Figure S6: Optic nerve electrophysiological recordings from P360 Sox10<sup>Cre</sup>-MCT1<sup>lox</sup> and MCT1<sup>lox</sup> optic nerves. Related to Figure 6.**

(A) Electrophysiological recording traces at baseline (black line) and during recovery (red line) in optic nerves isolated from either P360 MCT1<sup>lox</sup> (left panel) or P360 Sox10<sup>Cre</sup>-MCT1<sup>lox</sup> (right panel) mice (n=9).

(B) Normalized peak amplitude at baseline (0.1Hz stimulation), during a 30 sec. high frequency stimulation (100Hz) (S) and during 5 min. recovery (0.1Hz) in P360 MCT1<sup>lox</sup> and Sox10<sup>Cre</sup>-MCT1<sup>lox</sup> optic nerves. No significant differences are recorded between the two groups (n=9).

(C) There is no significant difference between P360 MCT1<sup>lox</sup> and Sox10<sup>Cre</sup>-MCT1<sup>lox</sup> optic nerves for Tau recovery time (50% recovery) after a high frequency stimulation burst (n=9). Data is represented as mean  $\pm$  SEM.

(D) There is no significant difference between P360 MCT1<sup>lox</sup> and Sox10<sup>Cre</sup>-MCT1<sup>lox</sup> optic nerves for peak conduction velocity after electrophysiological stimulation (n=9). Data is represented as mean ± SEM.

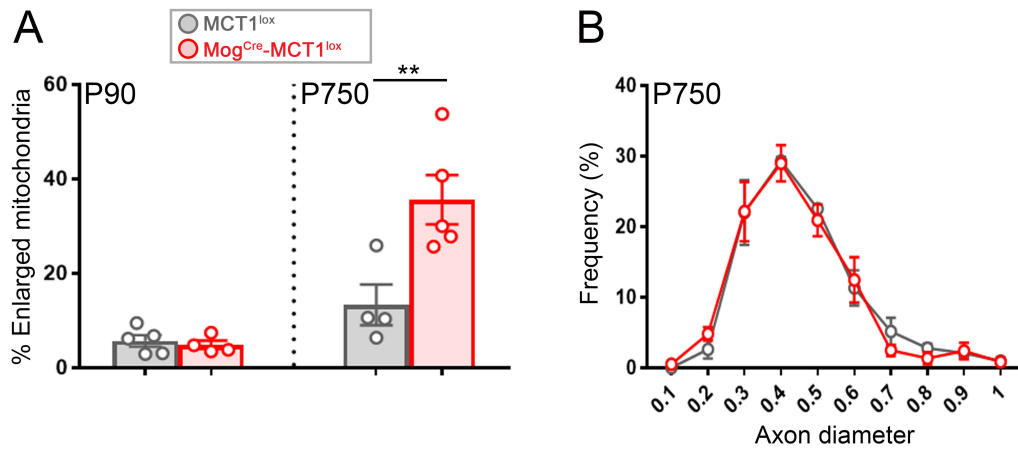

**Figure S7: Mitochondrial size and axon size distribution in P750 Mog<sup>Cre</sup>-MCT1<sup>lox</sup> and MCT1<sup>lox</sup> mice. Related to Figure 7.**

(A) The percentage of enlarged mitochondria was unchanged in P90 Mog<sup>Cre</sup>-MCT1<sup>lox</sup> but increased 2.7-fold in P750 optic nerves dissected from Mog<sup>Cre</sup>-MCT1<sup>lox</sup> and MCT1<sup>lox</sup> controls (n=4-5, \*\*p<0.01, two-way ANOVA with Sidak's multi-comparison test). Data is represented as mean ± SEM.

(B) There is no change in axon size distribution between P750 Mog<sup>Cre</sup>-MCT1<sup>lox</sup> and MCT1<sup>lox</sup> controls (n=4-5). Data is represented as mean ± SEM.

| Study                           | Output                                                                                    | n     | Results                                                  |
|---------------------------------|-------------------------------------------------------------------------------------------|-------|----------------------------------------------------------|
| Accelerated Rotarod             | Motor performance                                                                         | 6-9   | n.s. p=0.51                                              |
| Open Field                      | General locomotor Activity<br>- Distance traveled<br>- Speed<br>- Rearing<br>- Cen vs Per | 15-17 | n.s. p=0.96<br>n.s. p=0.63<br>n.s. p=0.69<br>n.s. p=0.42 |
| Catwalk                         | Gait, balance, stride<br>- Stride length                                                  | 6-9   | n.s. p=0.32                                              |
| Elevated Plus Maze              | Anxiety                                                                                   | 9-13  | *p<0.05                                                  |
| Y maze spontaneous alternations | Working memory<br>- Spontaneous alternations<br>- Arm entries                             | 15-17 | n.s. p=0.21<br>*p<0.05                                   |
| Passive avoidance test          | Learning/memory (fear)                                                                    | 20-21 | n.s. p=0.14                                              |
| Fear Trace conditioning         | Learning/memory (fear)<br>- Context<br>- Cued                                             | 15-17 | n.s. p=0.76<br>n.s. p=0.68                               |

**Table S1: Overview of the different animal behavior studies performed on P90 Sox10<sup>Cre</sup>-MCT1<sup>lox</sup> and MCT1<sup>lox</sup> mice. Related to Supplemental Figure 2.**



| <i>Mct1</i> het mice                                        | Sox10 <sup>Cre</sup> -MCT1 <sup>lox</sup> mice                            | Mog <sup>Cre</sup> -MCT1 <sup>lox</sup> mice                            |
|-------------------------------------------------------------|---------------------------------------------------------------------------|-------------------------------------------------------------------------|
| Optic nerve axonopathy by P240                              | Axonal degeneration by P360                                               | No axonal degeneration by P360<br>Prominent axonal degeneration by P750 |
| Enhanced glial reactivity by P240 in cortex and hippocampus | Enhanced microglial reactivity by P360, no change in astrocyte reactivity | No changes in glial reactivity up to P270                               |
| No myelin deficiencies by P240                              | Hypomyelination by P360                                                   | No myelin deficiencies                                                  |

**Table S2: Side by side comparison of observed phenotypes in *Mct1* het mice, Sox10<sup>Cre</sup>-MCT1<sup>lox</sup> mice and Mog<sup>Cre</sup>-MCT1<sup>lox</sup> mice. Related to Figures 5-7.**
